# Supplementary material for: Male pattern baldness and its association with coronary heart disease: a meta-analysis
Source: HighWire-hosted journal article supplement (doi:10.1136/bmjopen-2012-002537), 2013-01-01
Supplement: bmjopen-2012-002537supp.pdf [file bmjopen-2012-002537supp.pdf]

Supplementary Data 2. Newcastle-Ottawa quality assessment scale for observational studies

| Study reference (author, year) | Selection | Comparability | Outcome/Exposure |
|--------------------------------|-----------|---------------|------------------|
| Cohort studies                 |           |               |                  |
| Schnohor, 1995 (8)             | ***       | **            | ***              |
| Ford, 1996 (9)                 | ***       | **            | ***              |
| Lotufo, 2000 (10)              | ***       | **            | ***              |
| Case-control studies           |           |               |                  |
| Lesko, 1993 (11)               | **        | **            | **               |
| Miric, 1998 (12)               | ***       | **            | **               |
| Shahar, 2008 (13)              | ****      | **            | **               |
